# Supplementary material for: The Increased Risk of Hypertension Caused by Irrational Dietary Pattern May Be Associated with Th17 Cell in the Middle-Aged and Elderly Rural Residents of Beijing City, Northern China: A 1:1 Matched Case-Control Study
Source: MDPI journal article supplement (doi:10.3390/nu15020290), 2023-01-06
Supplement: s1 [file s1]

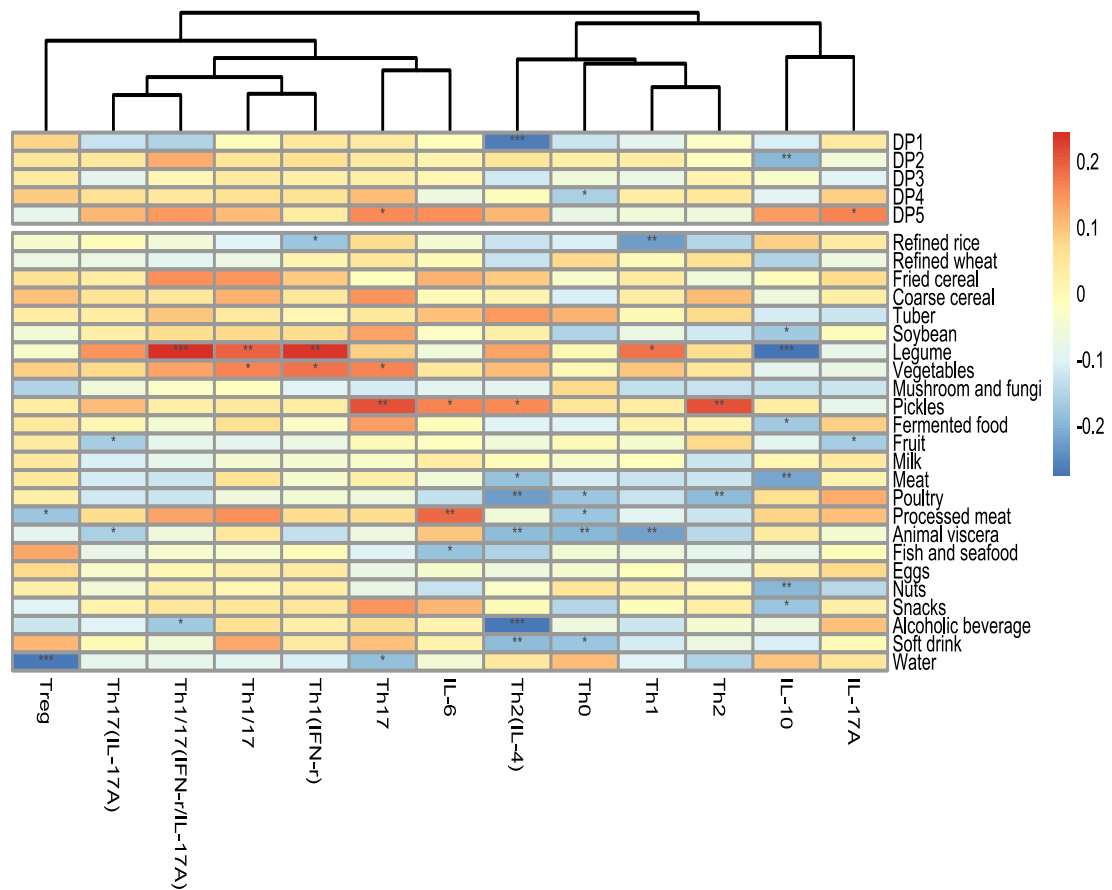

**Supplementary Figure S1.** Correlation between food group and the subset (absolute number) of CD4<sup>+</sup> T cells. Correlation coefficient  $r > 0$  was colored by red;  $r < 0$  was colored by blue, \*  $p < 0.05$ , \*\*  $p < 0.01$ , \*\*\*  $p < 0.001$ .
